# Supplementary material for: Porcine ZBED6 regulates growth of skeletal muscle and internal organs via multiple targets
Source: PubMed Central journal article supplement (PMC8577783; doi:10.1371/journal.pgen.1009862), 2021-10-28
Supplement: pgen.1009862.s004.pdf [file pgen.1009862.s004.pdf]

**Four sgRNAs sequences designed to uniquely target ZBED6**

| sgRNA                    | sgRNA-1              | sgRNA-2              | sgRNA-3               | sgRNA-4                   |
|--------------------------|----------------------|----------------------|-----------------------|---------------------------|
| sequence 5'→3'           | agaagggtttgcgaattaag | gtaaggatttgggatctggg | agagcaaagacttccattgtg | gtataacctggc<br>gggcaattt |
| gene knockout efficiency | 0%                   | 0%                   | 7.50%                 | 0%                        |

**Efficiency of ZBED6 cloning mutation**

| sgRNA   | Number of cell colonies | Efficiency of wildtype | Efficiency of gene mutation                     |                                               |
|---------|-------------------------|------------------------|-------------------------------------------------|-----------------------------------------------|
|         |                         |                        | 68% (39/57)                                     |                                               |
| sgRNA-3 | 57                      | 32% (18/57)            | Efficiency of biallelic mutation<br>49% (28/57) | Efficiency of allelic mutation<br>19% (11/57) |

**Summary of embryo transfer results from gene-targeted PEFs**

| Pig ID surrogate | Donor cells      | Embryos transferred | Pregnancy in 28 days | Piglets | KO  | Survival piglets               |
|------------------|------------------|---------------------|----------------------|---------|-----|--------------------------------|
| J-10             | Z17(+1 bp/+1 bp) | 187                 | Yes                  | 5       | Yes | 0                              |
| J-12             | Z23(-1 bp/-1 bp) | 212                 | Yes                  | 5       | Yes | 1(#182)<br>5                   |
| J-11             | Z28(-1 bp/-1 bp) | 182                 | Yes                  | 6       | Yes | (#175,#176,#177,#178,<br>#180) |
| Ttotal           | 3                | 581                 | 3                    | 16      | 16  | 6                              |
