# Supplementary material for: Porcine ZBED6 regulates growth of skeletal muscle and internal organs via multiple targets
Source: PubMed Central journal article supplement (PMC8577783; doi:10.1371/journal.pgen.1009862), 2021-10-28
Supplement: pgen.1009862.s009.pdf [file pgen.1009862.s009.pdf]

The DEGs of gastrocnemius muscle between WT and ZBED6<sup>-/-</sup> pigs

| GM_WT_mean  | GM_ZBED6 <sup>-/-</sup> _mean | GeneID             | gene name | log2FoldChange | pvalue      | padj        |
|-------------|-------------------------------|--------------------|-----------|----------------|-------------|-------------|
| 7.096858639 | 44.60156787                   | ENSSSCG00000040575 | ISG15     | 1.924675022    | 7.10E-11    | 1.90E-07    |
| 0.03929823  | 0.340534729                   | ENSSSCG00000011416 | DOCK3     | 1.766977875    | 5.41E-08    | 8.25E-05    |
| 35.92565709 | 72.30328329                   | ENSSSCG00000035293 | IGF2      | 1.009046617    | 3.98E-06    | 0.002366401 |
| 13.03388759 | 26.14499287                   | ENSSSCG00000001565 | CDKN1A    | 1.004267219    | 0.000100951 | 0.030978617 |
| 7.053369958 | 17.92610985                   | ENSSSCG00000031888 | DDIT4     | 1.219848019    | 1.41E-06    | 0.001192671 |
| 10.51281449 | 0.406020047                   | ENSSSCG00000031101 | METTL21C  | -2.546930916   | 9.88E-16    | 5.29E-12    |
| 0.736426853 | 7.901435658                   | ENSSSCG00000001550 | ARMC12    | 2.098800743    | 4.13E-11    | 1.33E-07    |
| 34.33707024 | 7.033609321                   | ENSSSCG00000000194 | GTSE1     | -1.659648883   | 1.32E-10    | 3.03E-07    |
| 0.663110808 | 2.207992918                   | ENSSSCG00000030548 | HERC5     | 1.520961211    | 1.83E-09    | 3.68E-06    |
| 0.041407076 | 0.420056993                   | ENSSSCG00000034914 | CD163L1   | 1.767262027    | 5.65E-08    | 8.25E-05    |
| 2.449091105 | 5.45208365                    | ENSSSCG00000016502 | PARP12    | 1.153302737    | 1.94E-07    | 0.000259295 |
| 14.16284607 | 31.89824872                   | ENSSSCG00000009881 | OAS2      | 1.138171599    | 7.24E-07    | 0.000811739 |
| 2.652355306 | 7.722775002                   | ENSSSCG00000008648 | RSAD2     | 1.304370231    | 7.99E-07    | 0.000811739 |

|             |             |                        |                        |              |          |             |
|-------------|-------------|------------------------|------------------------|--------------|----------|-------------|
| 0.979812289 | 2.739807852 | ENSSSCG000000<br>27847 | CSKMT                  | 1.325359107  | 9.98E-07 | 0.000896457 |
| 1.893966885 | 0.342673674 | ENSSSCG000000<br>40321 | F8A1                   | -1.494835622 | 1.77E-06 | 0.001409205 |
| 0.662026172 | 2.090255845 | ENSSSCG000000<br>09720 | DDX60                  | 1.370710549  | 1.93E-06 | 0.001409205 |
| 0.705317473 | 0.13359296  | ENSSSCG000000<br>39332 | SEC16B                 | -1.4530028   | 2.03E-06 | 0.001419623 |
| 2557.630902 | 8086.472382 | ENSSSCG000000<br>18065 | ND1                    | 1.31426755   | 2.99E-06 | 0.001922867 |
| 4.392482776 | 1.118192796 | ENSSSCG000000<br>27607 | IER3                   | -1.322848526 | 3.54E-06 | 0.002189095 |
| 1.793555289 | 9.674419141 | ENSSSCG000000<br>32451 | ENSSSCG000000<br>32451 | 1.480785045  | 4.20E-06 | 0.002407178 |
| 3.873607341 | 8.152987089 | ENSSSCG000000<br>30408 | DDX58                  | 1.037894393  | 6.36E-06 | 0.003403694 |
| 23.21851764 | 63.52546601 | ENSSSCG000000<br>16057 | STAT1                  | 1.23392189   | 1.05E-05 | 0.005418599 |
| 14.69885606 | 59.73956355 | ENSSSCG000000<br>13400 | MICAL2                 | 1.376572395  | 1.11E-05 | 0.005474671 |
| 4.719403176 | 0.879300918 | ENSSSCG000000<br>40769 | LOC110257712           | -1.380943601 | 1.12E-05 | 0.005474671 |
| 4.844659283 | 13.86537851 | ENSSSCG000000<br>16200 | PRKAG3                 | 1.211236295  | 1.97E-05 | 0.009058926 |
| 8.629997192 | 23.937901   | ENSSSCG000000<br>10452 | IFIT1                  | 1.167220609  | 4.32E-05 | 0.017351323 |
| 0.841561164 | 4.737990524 | ENSSSCG000000<br>02279 | GPX2                   | 1.321803434  | 4.88E-05 | 0.019103821 |

|             |             |                        |                        |              |             |             |
|-------------|-------------|------------------------|------------------------|--------------|-------------|-------------|
| 2435.845296 | 6153.413093 | ENSSSCG000000<br>18069 | ND2                    | 1.104603475  | 5.42E-05    | 0.020430895 |
| 3.243725187 | 0.637451332 | ENSSSCG000000<br>09364 | FREM2                  | -1.270236218 | 5.47E-05    | 0.020430895 |
| 0.084640841 | 0.292707029 | ENSSSCG000000<br>35805 | DLK1                   | 1.243577142  | 6.74E-05    | 0.023545566 |
| 0.615577648 | 0.080926691 | ENSSSCG000000<br>07261 | BPIFB1                 | -1.295993283 | 6.95E-05    | 0.023767541 |
| 0.911140235 | 2.254643868 | ENSSSCG000000<br>37520 | ZNF275                 | 1.137432709  | 7.55E-05    | 0.025268853 |
| 6.204664623 | 16.50167128 | ENSSSCG000000<br>21712 | HERC6                  | 1.141637863  | 7.95E-05    | 0.026074551 |
| 0.953854026 | 3.356432995 | ENSSSCG000000<br>37572 | EPSTI1                 | 1.25028767   | 8.43E-05    | 0.026560617 |
| 0.588114079 | 0.057160124 | ENSSSCG000000<br>02811 | CNGB1                  | -1.233669861 | 0.000130878 | 0.03893609  |
| 30.16164063 | 87.70969392 | ENSSSCG000000<br>37775 | R-SSC-202733           | 1.128580422  | 0.000136696 | 0.039927724 |
| 2.395955201 | 0.415753414 | ENSSSCG000000<br>37106 | ECRG4                  | -1.229335132 | 0.000140306 | 0.040250405 |
| 13537.11502 | 223.4308952 | ENSSSCG000000<br>35520 | ENSSSCG000000<br>35520 | -3.56345424  | 1.38E-30    | 2.21E-26    |
| 21.94193623 | 1194.98784  | ENSSSCG000000<br>18080 | ATP8                   | 3.184236799  | 2.12E-23    | 1.70E-19    |
| 4.771926749 | 14.27884964 | ENSSSCG000000<br>00774 | USP18                  | 1.515934362  | 2.31E-11    | 9.26E-08    |
| 0.165657652 | 1.319184539 | ENSSSCG000000<br>09240 | PLAC8                  | 1.757761547  | 4.82E-08    | 8.25E-05    |

|             |             |                        |                        |              |          |             |
|-------------|-------------|------------------------|------------------------|--------------|----------|-------------|
| 8.449141161 | 22.45993617 | ENSSSCG000000<br>35297 | ISG12(A)               | 1.261334191  | 3.31E-07 | 0.000409009 |
| 6.593783715 | 19.58398629 | ENSSSCG000000<br>12077 | MX1                    | 1.332862879  | 8.08E-07 | 0.000811739 |
| 0.041106511 | 0.252392865 | ENSSSCG000000<br>29606 | AOX1                   | 1.582382868  | 1.00E-06 | 0.000896457 |
| 2.798117862 | 6.559275725 | ENSSSCG000000<br>08647 | CMPK2                  | 1.1653153    | 1.88E-06 | 0.001409205 |
| 3.305084538 | 9.009184516 | ENSSSCG000000<br>12076 | MX2                    | 1.246188906  | 2.41E-06 | 0.001611519 |
| 0.994699365 | 4.532191623 | ENSSSCG000000<br>12386 | FAM155B                | 1.465811305  | 5.42E-06 | 0.003001639 |
| 5.57992168  | 0.194062436 | ENSSSCG000000<br>31306 | ENSSSCG000000<br>31306 | -1.323941996 | 2.80E-05 | 0.012166283 |
| 1.498181551 | 3.315182218 | ENSSSCG000000<br>17416 | DHX58                  | 1.04388693   | 6.34E-05 | 0.022651021 |

Note : ZBED6 targets are in red type.
